# Supplementary material
Source: PubMed Central journal article supplement (PMC3388906)
Supplement: NIHMS357636-supplement-supplement_1.pdf [file NIHMS357636-supplement-supplement_1.pdf]

1  
2  
3  
4  
5  
6  
7  
8  
9  
10  
11  
12  
13  
14  
15  
16  
17  
18  
19  
20  
21  
22  
23  
24  
25  
26  
27  
28  
29  
30  
31  
32  
33  
34  
35  
36  
37  
38  
39  
40  
41  
42  
43  
44  
45  
46  
47  
48  
49  
50  
51  
52  
53  
54  
55  
56  
57  
58  
59  
60

Patient 1

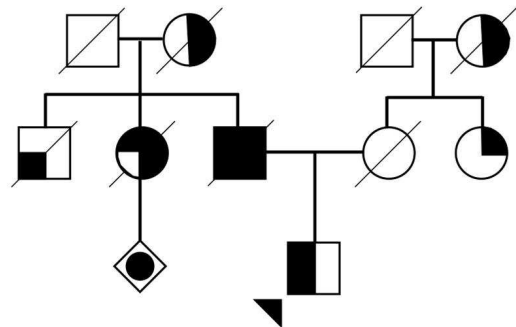

Patient 2

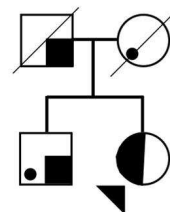

**Legend**

|          |                  |               |                                   |
|----------|------------------|---------------|-----------------------------------|
| dementia | bvFTD-SP         | OCD           | unspecified psychiatric diagnosis |
| AD       | bipolar disorder | schizophrenia | alcohol / substance abuse         |

Family pedigrees for Patients 1 and 2. Proband is indicated by black triangle. AD – Alzheimer’s disease, bvFTD-SP – slowly progressive behavioral variant frontotemporal dementia, OCD – obsessive-compulsive disorder.

129x77mm (300 x 300 DPI)

For Review Only

1  
2  
3 Description of neuropathological findings in father of Patient 1.  
4  
5

6  
7 After Patient 1 was found to harbor a C9ORF72 mutation we were able to obtain limited  
8  
9 brain autopsy specimens from the patient's father. These studies revealed an unclassifiable  
10  
11 subtype of FTLD-TDP with TDP-43-immunoreactive dots, threads, and neuronal cytoplasmic  
12  
13 inclusions (NCIs) that were sparse in frontal and entorhinal cortex and moderate in  
14  
15 hippocampal CA1/subiculum, accompanied by hippocampal sclerosis. In the hippocampus,  
16  
17 frequent ubiquitin-positive, TDP-43-negative small, round NCIs were identified in dentate gyrus,  
18  
19 along with scattered round or stellate NCIs in all subfields of Ammon's horn. In addition, mild  
20  
21 argyrophilic grain disease affecting medial temporal lobe structures (especially CA2) was  
22  
23 present. Scattered diffuse amyloid plaques were seen in frontal cortex, and no alpha-synuclein  
24  
25 pathology was identified.  
26  
27  
28  
29  
30  
31  
32  
33  
34  
35  
36  
37  
38  
39  
40  
41  
42  
43  
44  
45  
46  
47  
48  
49  
50  
51  
52  
53  
54  
55  
56  
57  
58  
59  
60
